# Supplementary material for: Systemic release of heat-shock protein 27 and 70 following severe trauma
Source: PubMed Central journal article supplement (PMC6610099; doi:10.1038/s41598-019-46034-w), 2019-07-03
Supplement: 41598_2019_46034_MOESM1_ESM.pdf [file 41598_2019_46034_MOESM1_ESM.pdf]

## **Systemic release of heat-shock protein 27 and 70 following severe trauma.**

Thomas Haider<sup>1\*</sup>, Elisabeth Simader<sup>2</sup>, Olaf Glück<sup>2</sup>, Hendrik J. Ankersmit<sup>2</sup>, Thomas Heinz<sup>1</sup>, Stefan Hajdu<sup>1</sup>, Lukas L. Negrin<sup>1</sup>

1 Department of Orthopedics and Trauma Surgery, Medical University of Vienna, Waehringer Guertel 18-20, 1090 Vienna, Austria

2 Department of Thoracic Surgery, Medical University of Vienna, Waehringer Guertel 18-20, 1090 Vienna, Austria

\* Corresponding Author: Thomas Haider, M.D., Ph.D.

Department of Orthopedics and Trauma Surgery

Medical University of Vienna

Waehringer Guertel 18-20

1090 Vienna, Austria

email: [thomas.a.haider@meduniwien.ac.at](mailto:thomas.a.haider@meduniwien.ac.at)

|              |                         |                         | HSP27_d1 | HSP27_d2 | HSP70_d1 | HSP70_d2 | CRP_d1 | CRP_d2 | Leukos_d1 | Leukos_d2 | HB_d1   | HB_d2  |
|--------------|-------------------------|-------------------------|----------|----------|----------|----------|--------|--------|-----------|-----------|---------|--------|
| Spearman-Rho | HSP27_d1                | Correlation coefficient | 1,000    | ,350**   | ,769**   | ,059     | -,119  | ,195*  | ,076      | -,004     | -,296** | -,118  |
|              |                         | Sig. (2-seitig)         | .        | ,000     | ,000     | ,579     | ,209   | ,045   | ,421      | ,964      | ,001    | ,227   |
|              |                         | N                       | 114      | 100      | 106      | 92       | 113    | 107    | 114       | 107       | 114     | 107    |
|              | HSP27_d2                | Correlation coefficient | ,350**   | 1,000    | ,324**   | ,243*    | -,037  | ,159   | -,079     | -,049     | -,436** | -,193  |
|              |                         | Sig. (2-seitig)         | ,000     | .        | ,001     | ,019     | ,706   | ,115   | ,426      | ,628      | ,000    | ,054   |
|              |                         | N                       | 100      | 105      | 95       | 93       | 104    | 99     | 105       | 99        | 105     | 100    |
|              | HSP70_d1                | Correlation coefficient | ,769**   | ,324**   | 1,000    | ,193     | -,170  | ,136   | ,131      | ,035      | -,185   | -,014  |
|              |                         | Sig. (2-seitig)         | ,000     | ,001     | .        | ,067     | ,079   | ,175   | ,176      | ,729      | ,056    | ,888   |
|              |                         | N                       | 106      | 95       | 108      | 91       | 107    | 101    | 108       | 101       | 108     | 102    |
|              | HSP70_d2                | Correlation coefficient | ,059     | ,243*    | ,193     | 1,000    | ,095   | -,159  | ,230*     | ,043      | -,205*  | -,029  |
|              |                         | Sig. (2-seitig)         | ,579     | ,019     | ,067     | .        | ,359   | ,131   | ,024      | ,687      | ,043    | ,781   |
|              |                         | N                       | 92       | 93       | 91       | 97       | 96     | 92     | 97        | 92        | 97      | 93     |
|              | CRP_d1                  | Correlation coefficient | -,119    | -,037    | -,170    | ,095     | 1,000  | ,374** | ,052      | ,058      | ,087    | ,078   |
|              |                         | Sig. (2-seitig)         | ,209     | ,706     | ,079     | ,359     | .      | ,000   | ,573      | ,546      | ,349    | ,414   |
|              |                         | N                       | 113      | 104      | 107      | 96       | 119    | 111    | 119       | 111       | 119     | 112    |
|              | CRP_d2                  | Correlation coefficient | ,195*    | ,159     | ,136     | -,159    | ,374** | 1,000  | ,118      | ,060      | -,054   | -,152  |
|              |                         | Sig. (2-seitig)         | ,045     | ,115     | ,175     | ,131     | ,000   | .      | ,216      | ,526      | ,570    | ,110   |
|              |                         | N                       | 107      | 99       | 101      | 92       | 111    | 112    | 112       | 112       | 112     | 112    |
|              | Leukos_d1               | Correlation coefficient | ,076     | -,079    | ,131     | ,230*    | ,052   | ,118   | 1,000     | ,228*     | ,243**  | ,046   |
|              |                         | Sig. (2-seitig)         | ,421     | ,426     | ,176     | ,024     | ,573   | ,216   | .         | ,016      | ,008    | ,631   |
|              |                         | N                       | 114      | 105      | 108      | 97       | 119    | 112    | 120       | 112       | 120     | 113    |
|              | Leukos_d2               | Correlation coefficient | -,004    | -,049    | ,035     | ,043     | ,058   | ,060   | ,228*     | 1,000     | ,154    | ,354** |
|              |                         | Sig. (2-seitig)         | ,964     | ,628     | ,729     | ,687     | ,546   | ,526   | ,016      | .         | ,104    | ,000   |
|              |                         | N                       | 107      | 99       | 101      | 92       | 111    | 112    | 112       | 112       | 112     | 112    |
| HB_d1        | Correlation coefficient | -,296**                 | -,436**  | -,185    | -,205*   | ,087     | -,054  | ,243** | ,154      | 1,000     | ,461**  |        |
|              | Sig. (2-seitig)         | ,001                    | ,000     | ,056     | ,043     | ,349     | ,570   | ,008   | ,104      | .         | ,000    |        |
|              | N                       | 114                     | 105      | 108      | 97       | 119      | 112    | 120    | 112       | 120       | 113     |        |
| HB_d2        | Correlation coefficient | -,118                   | -,193    | -,014    | -,029    | ,078     | -,152  | ,046   | ,354**    | ,461**    | 1,000   |        |
|              | Sig. (2-seitig)         | ,227                    | ,054     | ,888     | ,781     | ,414     | ,110   | ,631   | ,000      | ,000      | .       |        |
|              | N                       | 107                     | 100      | 102      | 93       | 112      | 112    | 113    | 112       | 113       | 113     |        |
